# Supplementary material for: The effect of electrostatic field on the catalytic properties of platinum clusters confined in zeolite for hydrogenation
Source: Royal Society of Chemistry journal article supplement (doi:10.1039/c8cy01867g), 2018-01-01
Supplement: c8cy01867g1.pdf [file c8cy01867g1.pdf]

## Supporting Information

### **The Electrostatic Field Effect on Catalytic Properties of Platinum Clusters Confined in Zeolite for Hydrogenation**

*Zhiyang Zhang<sup>1†</sup>, Yanle Li<sup>1,2†</sup>, Jing Gu<sup>1,3</sup>, Liping Ding<sup>1</sup>, Nianhua Xue<sup>1</sup>, Luming Peng<sup>1</sup>, Xuefeng Guo<sup>1</sup>, Yan Zhu<sup>1</sup>, Jing Ma<sup>1,2\*</sup> and Weiping Ding<sup>1\*</sup>*

<sup>1</sup>Key Lab of Mesoscopic Chemistry, School of Chemistry and Chemical Engineering, Nanjing University, Nanjing 210093, China.

<sup>2</sup>Institute of Theoretical and Computational Chemistry, School of Chemistry and Chemical Engineering, Nanjing University, Nanjing 210093, China.

<sup>3</sup>School of Chemistry and Chemical Engineering, Anhui University of Technology, No.59 Hudong Road, Maanshan 243002, China.

<sup>†</sup>These authors contribute equally to this research.

<sup>\*</sup>Correspondence author. E-mail: dingwp@nju.edu.cn; majing@nju.edu.cn

**Table S1.** The surface area and pore volumes of the samples

| Samples              | BET Surface Area<br>(m <sup>2</sup> ·g <sup>-1</sup> ) | External Surface<br>Area (t-Plot, m <sup>2</sup> ·g <sup>-1</sup> ) | Micropore<br>volume (cm <sup>3</sup> ·g <sup>-1</sup> )<br><sup>1)</sup> | Mesopore<br>volume (cm <sup>3</sup> ·g <sup>-1</sup> )<br><sup>1)</sup> |
|----------------------|--------------------------------------------------------|---------------------------------------------------------------------|--------------------------------------------------------------------------|-------------------------------------------------------------------------|
| NaX                  | 682                                                    | 41                                                                  | 0.2997                                                                   | 0.0301                                                                  |
| Pt <sub>m</sub> /NaX | 635                                                    | 40                                                                  | 0.2779                                                                   | 0.0325                                                                  |
| Pt <sub>n</sub> @NaX | 582                                                    | 34                                                                  | 0.1498                                                                   | 0.0435                                                                  |

**Table S2.** The composition of the samples measured by X-ray fluorescence (XRF) analysis.

| Catalysts            | SiO <sub>2</sub> | Al <sub>2</sub> O <sub>3</sub> | Na <sub>2</sub> O | Cs <sub>2</sub> O | CaO  | La <sub>2</sub> O <sub>3</sub> | Exchanging degree (%) |
|----------------------|------------------|--------------------------------|-------------------|-------------------|------|--------------------------------|-----------------------|
| Pt <sub>m</sub> /NaX | 50.97            | 31.90                          | 15.50             | --                | --   | --                             | --                    |
| Pt <sub>m</sub> /CsX | 36.13            | 23.03                          | 3.37              | 37.02             | --   | --                             | 70.9                  |
| Pt <sub>m</sub> /CaX | 51.62            | 31.75                          | 4.32              | --                | 11.7 | --                             | 72.1                  |
|                      |                  |                                |                   |                   | 3    |                                |                       |
| Pt <sub>m</sub> /LaX | 50.34            | 29.85                          | 4.14              | --                | --   | 15.14                          | 67.7                  |

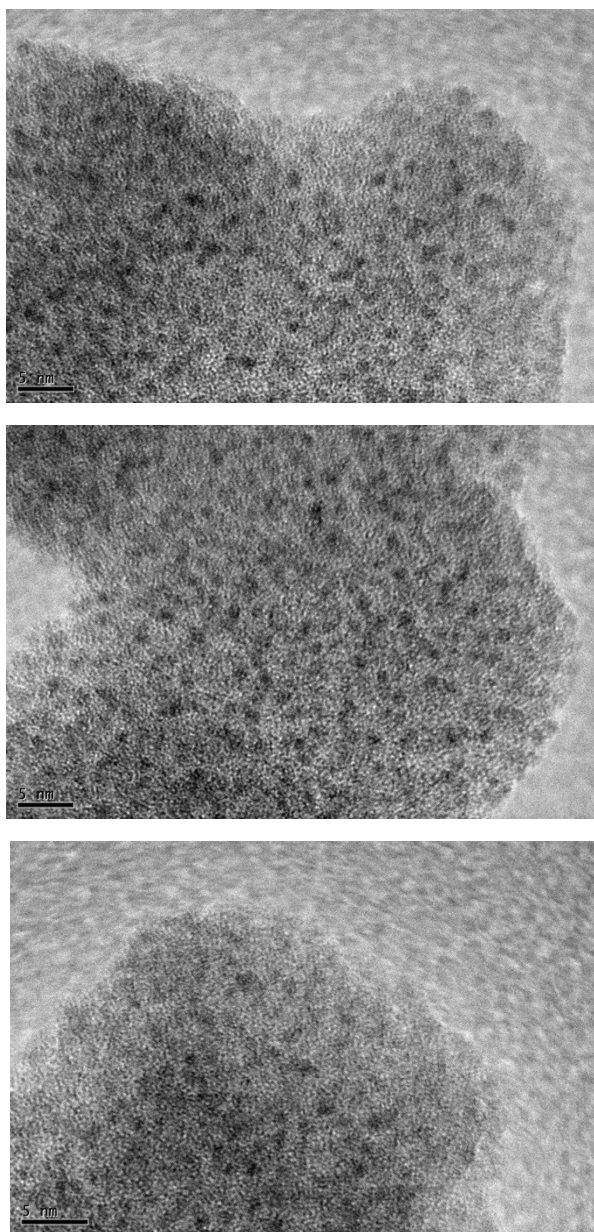

**Figure S1.** The results of HR-TEM images for Pt<sub>n</sub>@NaX in different areas.

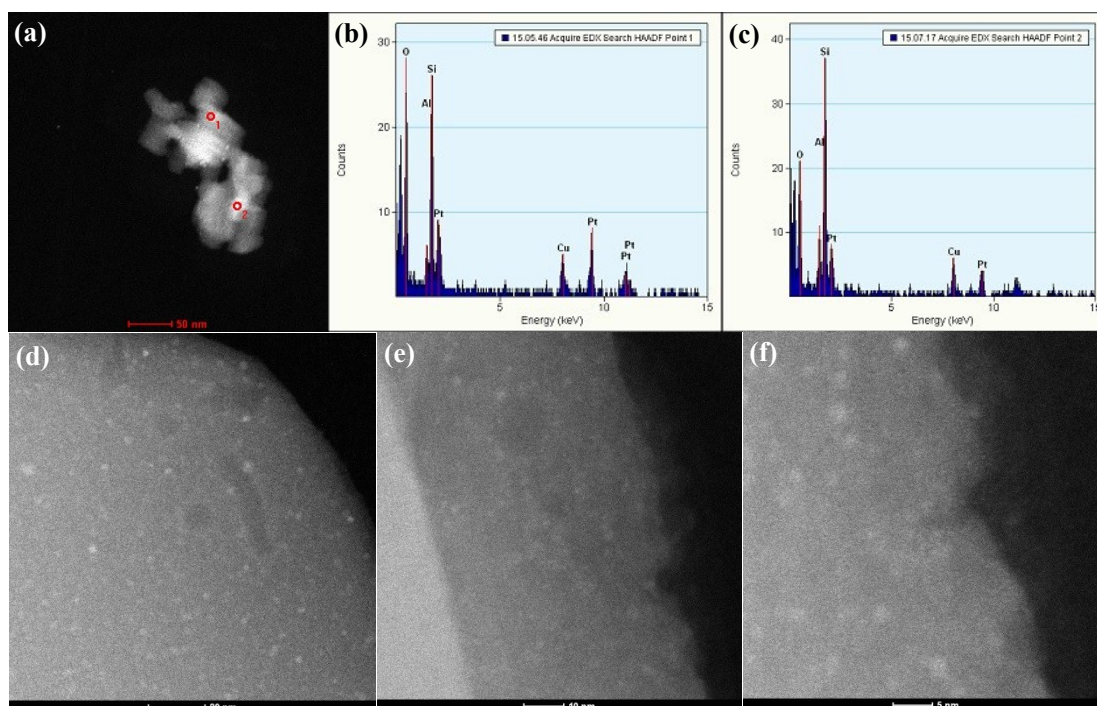

**Figure S2.** The HAADF-STEM results of  $\text{Pt}_n\text{@NaX}$  (a) EDX spectra in area 1 (b) and area 2 (c), (d) (e) (f)  $\text{Pt}_m/\text{NaX}$ .

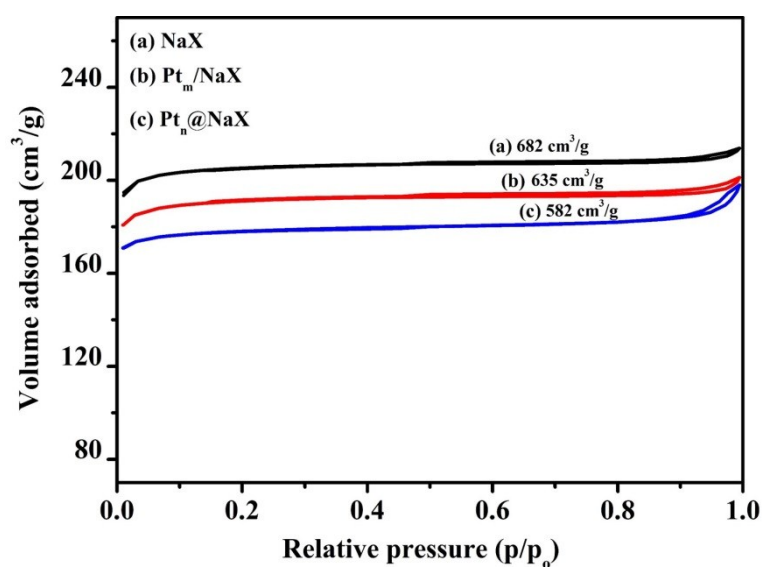

**Figure S3.** The  $\text{N}_2$  adsorption/desorption isotherms of (a) NaX, (b)  $\text{Pt}_m/\text{NaX}$ , (c)  $\text{Pt}_n\text{@NaX}$ . (The  $\text{N}_2$  adsorption/desorption isotherms of the three samples all display typical Langmuir-type curve (I-type) and their shapes are the same).

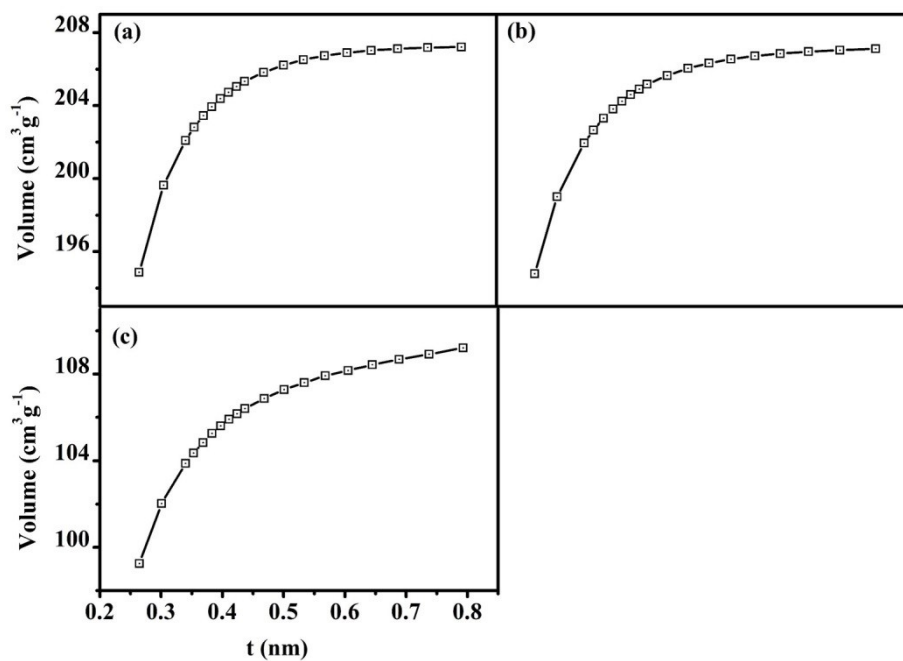

**Figure S4.** The t-plot curves from N<sub>2</sub>-adsorption for (a) NaX, (b) Pt<sub>m</sub>/NaX, (c) Pt<sub>n</sub>@NaX.

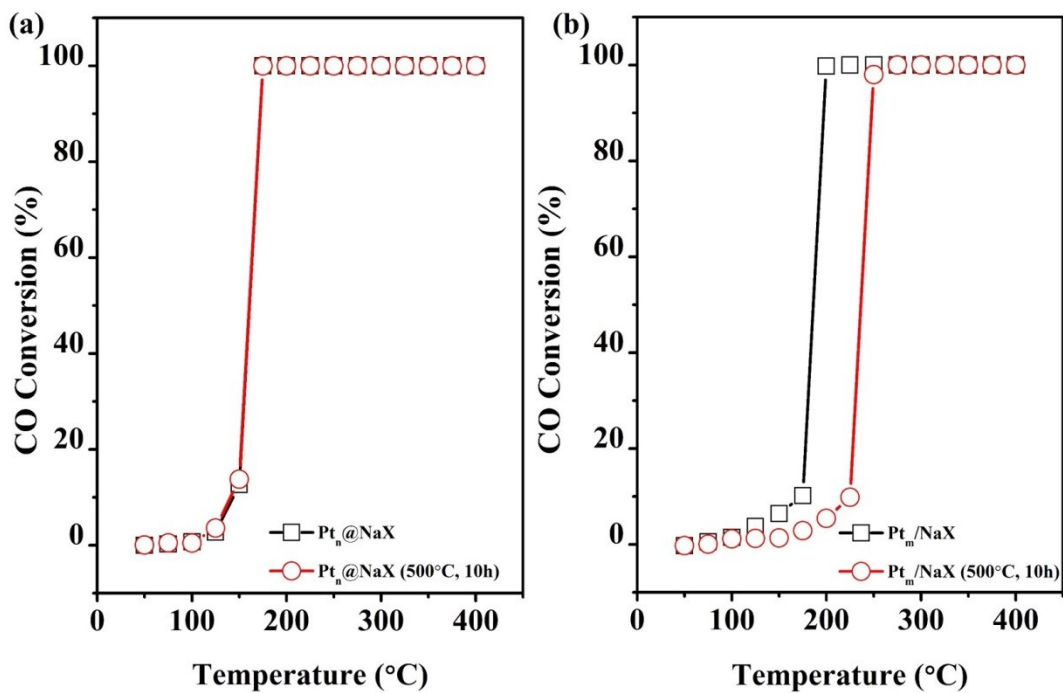

**Figure S5.** (a) The CO conversion over Pt<sub>n</sub>@NaX and (b) Pt<sub>m</sub>/NaX after the prolonged time of 10 h reaction at 500°C.

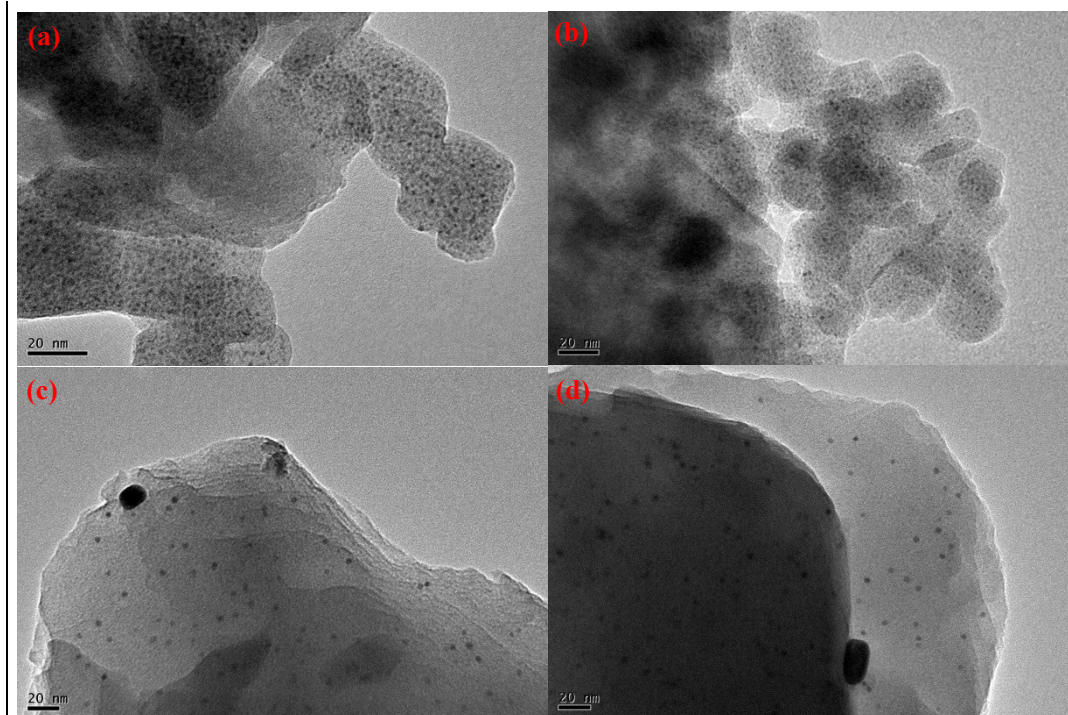

**Figure S6.** (a), (b): The HR-TEM images for Pt<sub>n</sub>@NaX after the prolonged time of 10 h reaction at 600°C in different areas; (c), (d): The HR-TEM images for Pt<sub>m</sub>/NaX after the prolonged time of 10 h reaction at 600°C in different areas.

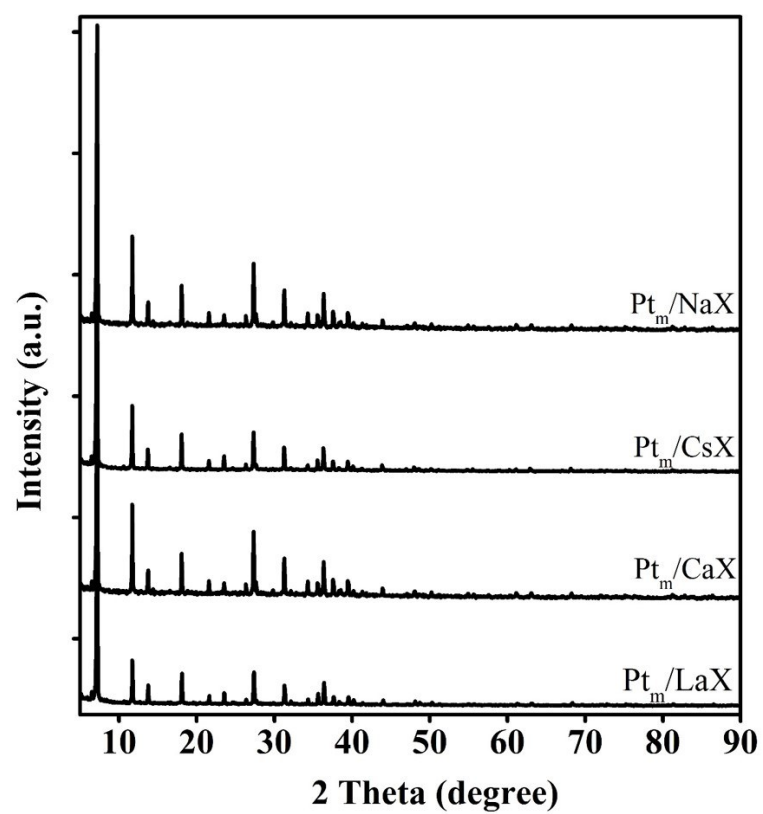

**Figure S7.** The results of X-ray diffraction patterns of Pt<sub>m</sub>/MX (M = Na<sup>+</sup>, Cs<sup>+</sup>, Ca<sup>2+</sup>, La<sup>3+</sup>).



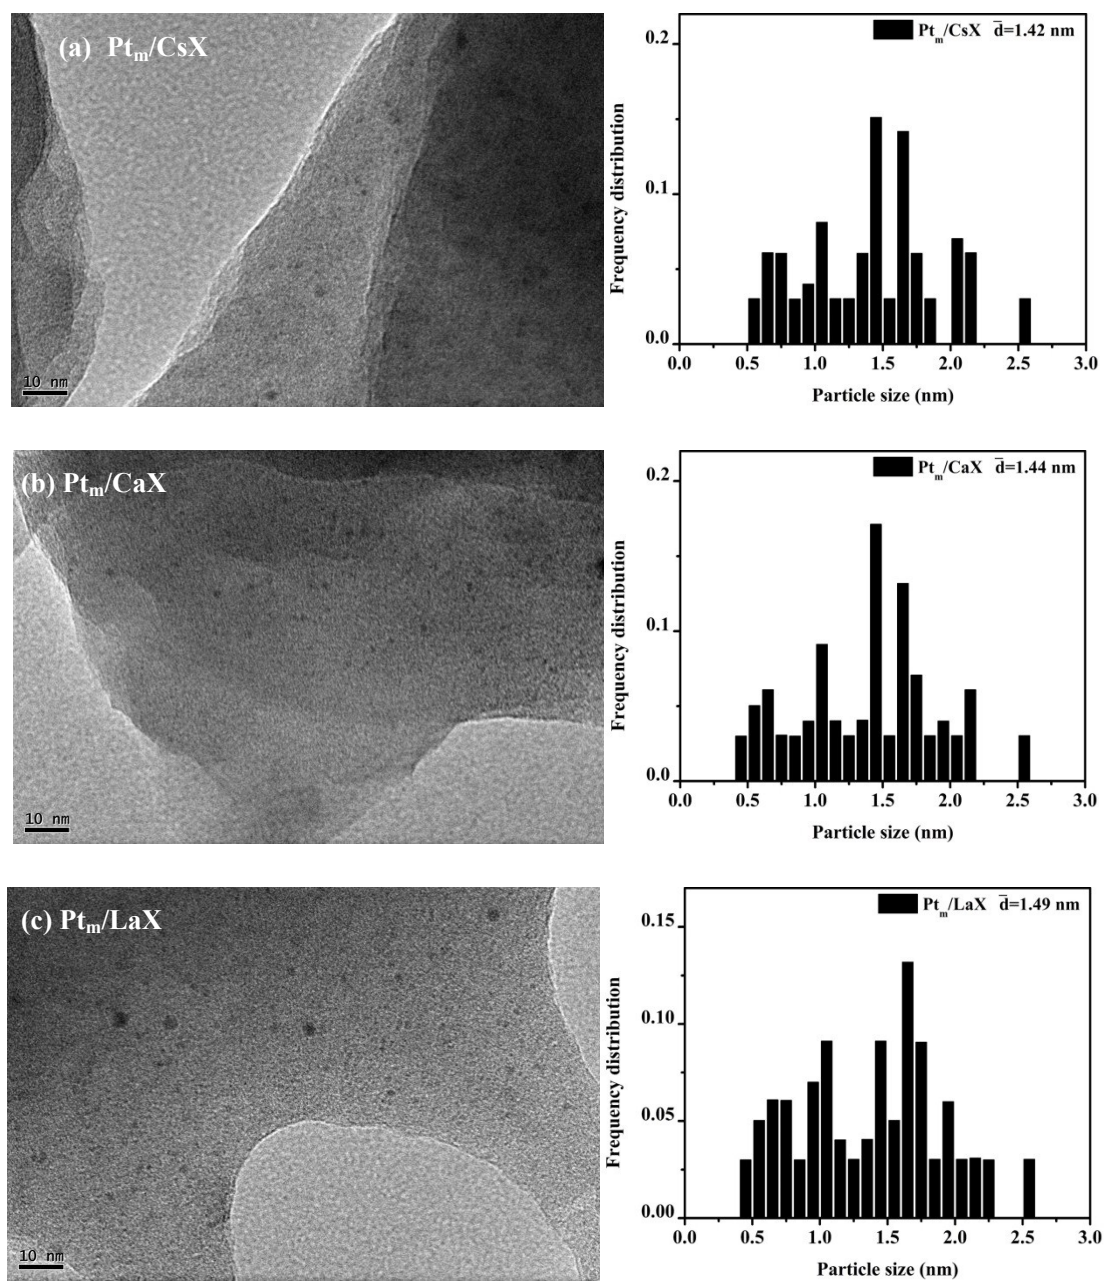

**Figure S8.** The results of HR-TEM images of (a) Pt<sub>m</sub>/CsX, (b) Pt<sub>m</sub>/CaX, (c) Pt<sub>m</sub>/LaX.



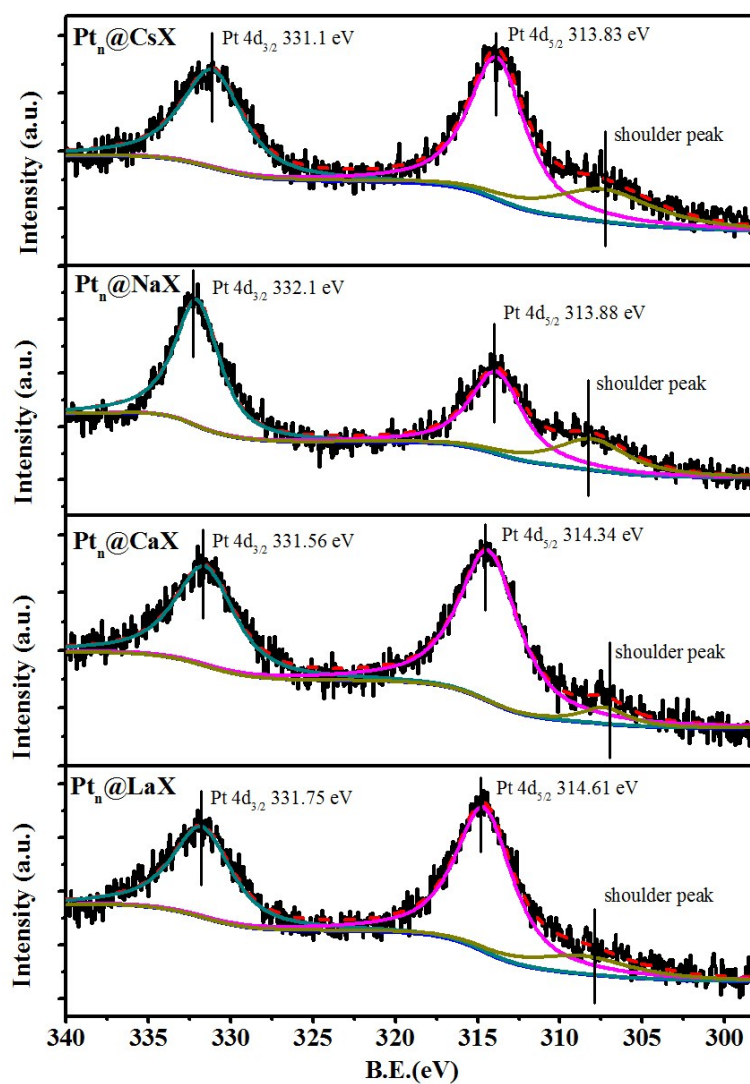

**Figure S9.** The Pt4d in-situ XPS results of Pt<sub>n</sub>@MX (M=Cs<sup>+</sup>, Na<sup>+</sup>, Ca<sup>2+</sup>, La<sup>3+</sup>).

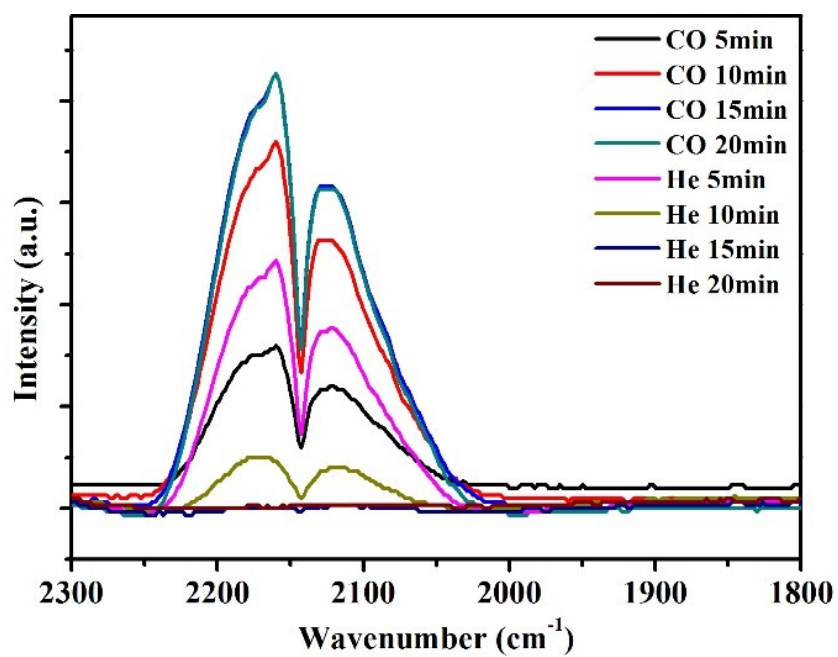

**Figure S10.** The in-situ DRIFTS of CO adsorption on pure NaX zeolite crystals.

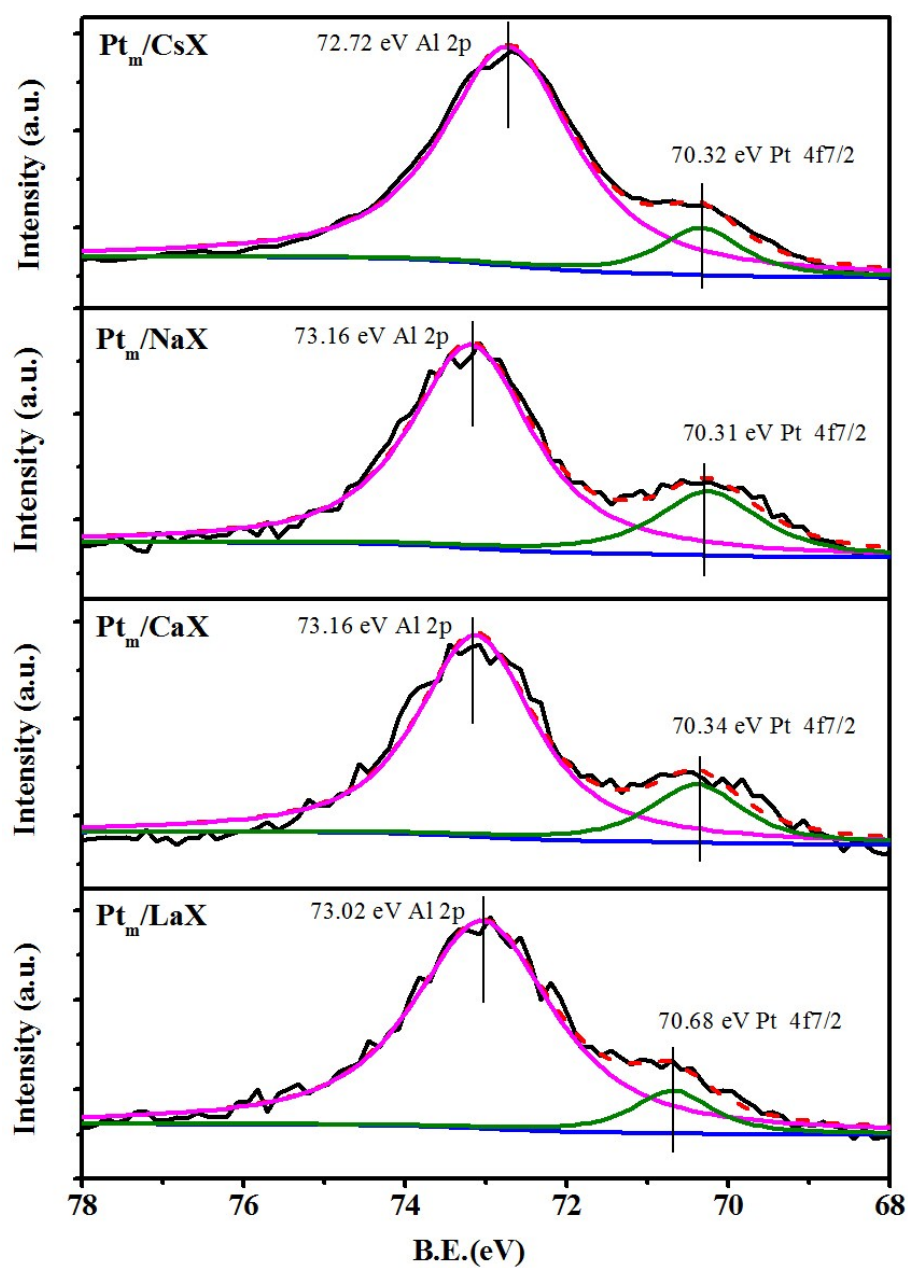

**Figure S11.** The Pt4f in-situ XPS results of Pt<sub>m</sub>/MX (M=Cs<sup>+</sup>, Na<sup>+</sup>, Ca<sup>2+</sup>, La<sup>3+</sup>)

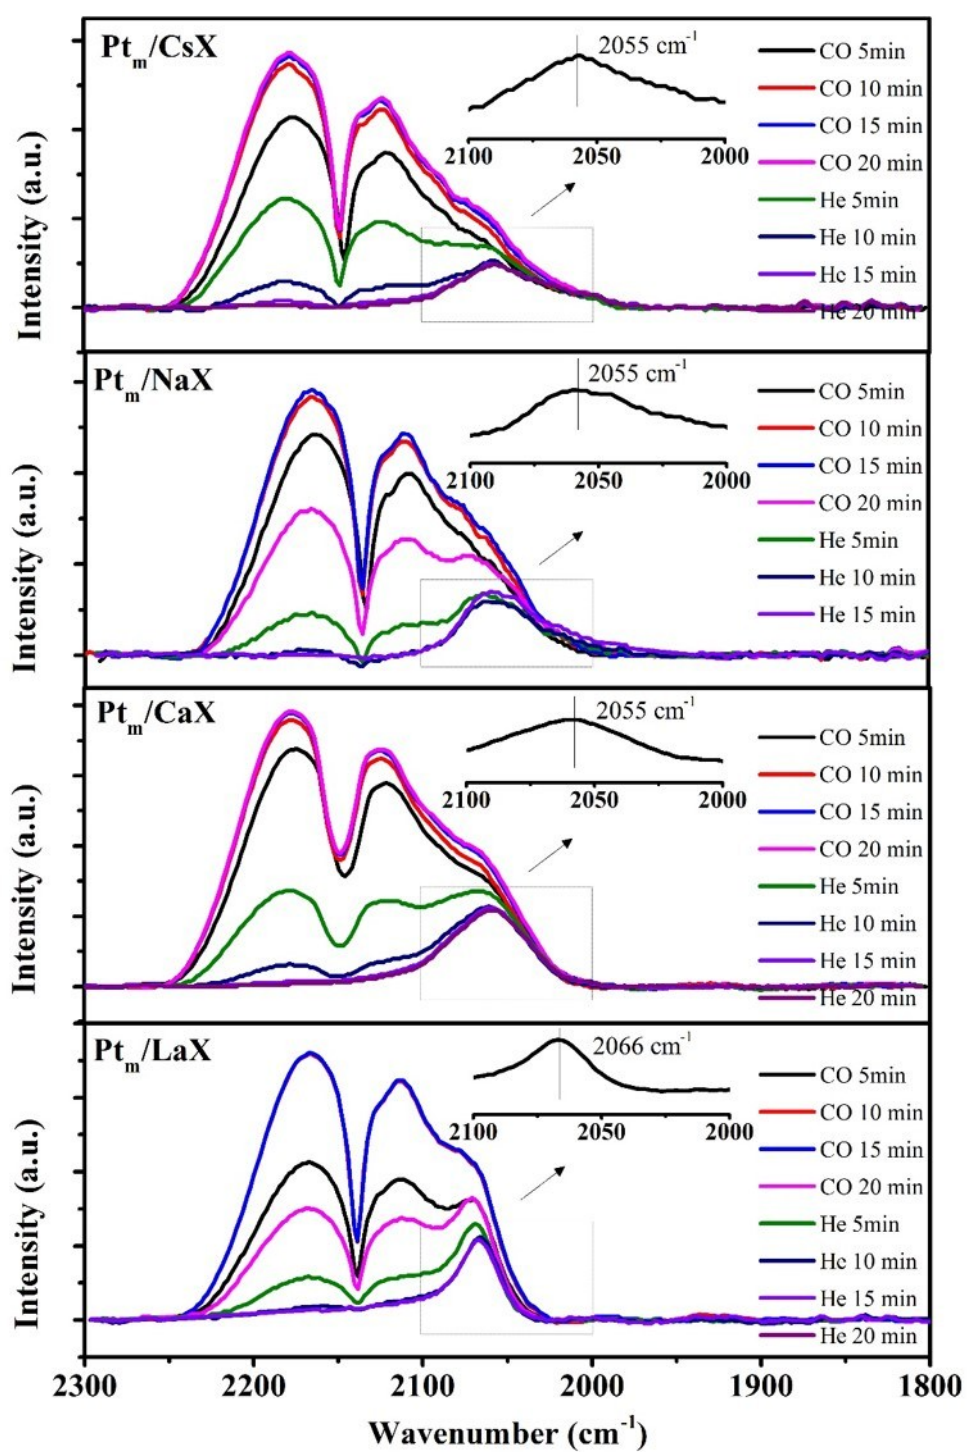

**Figure S12.** The in-situ DRIFTS of CO adsorption on Pt<sub>m</sub>/MX (M=Na<sup>+</sup>, Cs<sup>+</sup>, Ca<sup>2+</sup> or La<sup>3+</sup>) after the adsorption of CO in 25 mL·min<sup>-1</sup> for 10 min and then purged in 50 mL·min<sup>-1</sup> flowing He for various times.

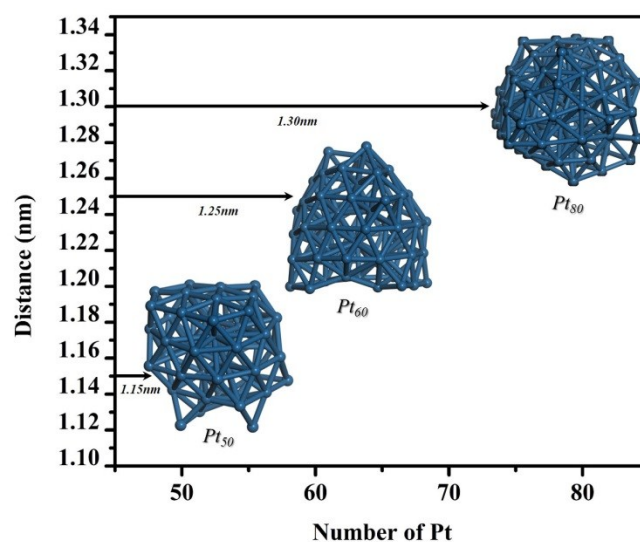

**Figure S13.** The optimized structure and size of the platinum clusters with different platinum atoms ( $Pt_{50}$ ,  $Pt_{60}$ ,  $Pt_{80}$ ) by VASP using DFT calculations.

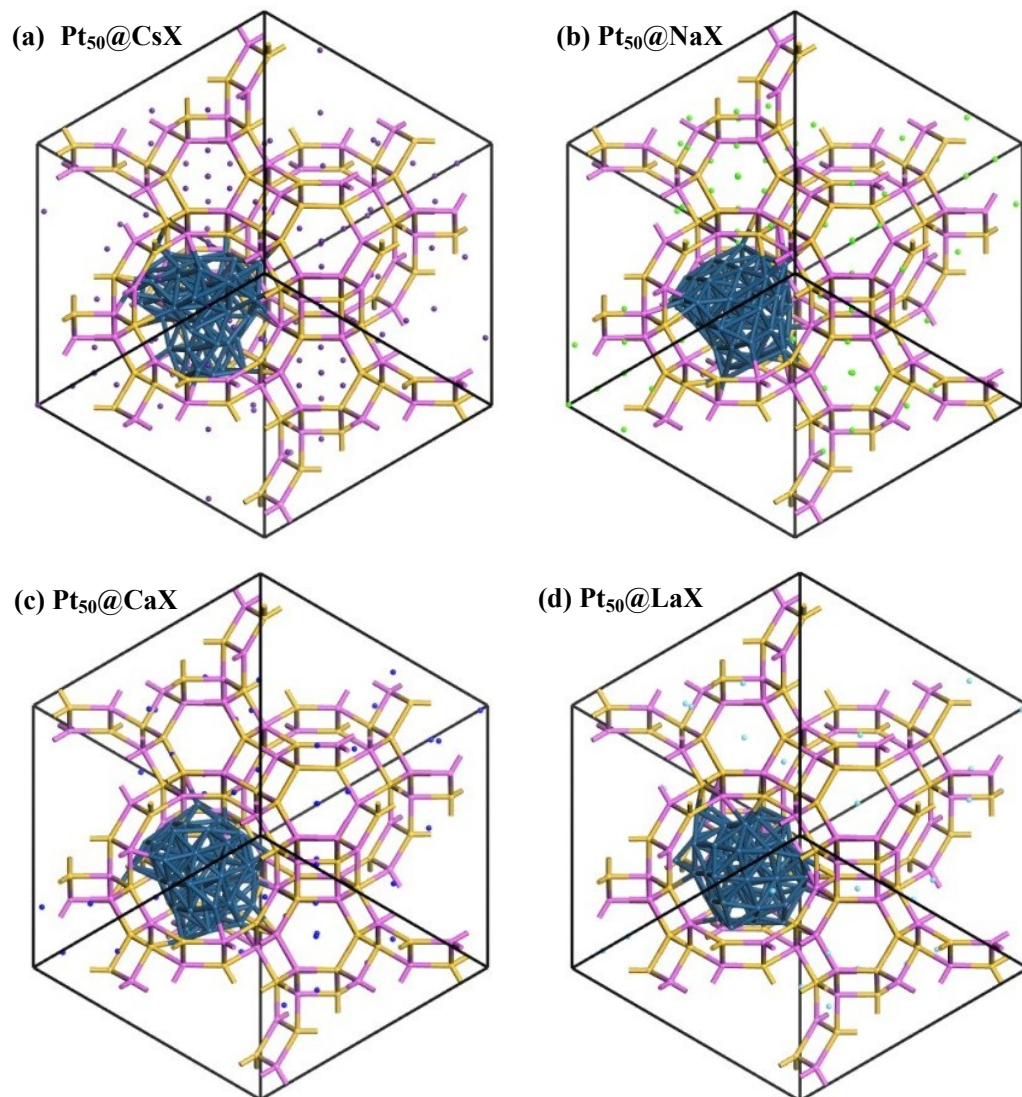

**Figure S14.** The optimized structures of the four models (a)  $\text{Pt}_{50}@\text{CsX}$ , (b)  $\text{Pt}_{50}@\text{NaX}$ , (c)  $\text{Pt}_{50}@\text{CaX}$ , (d)  $\text{Pt}_{50}@\text{LaX}$ .



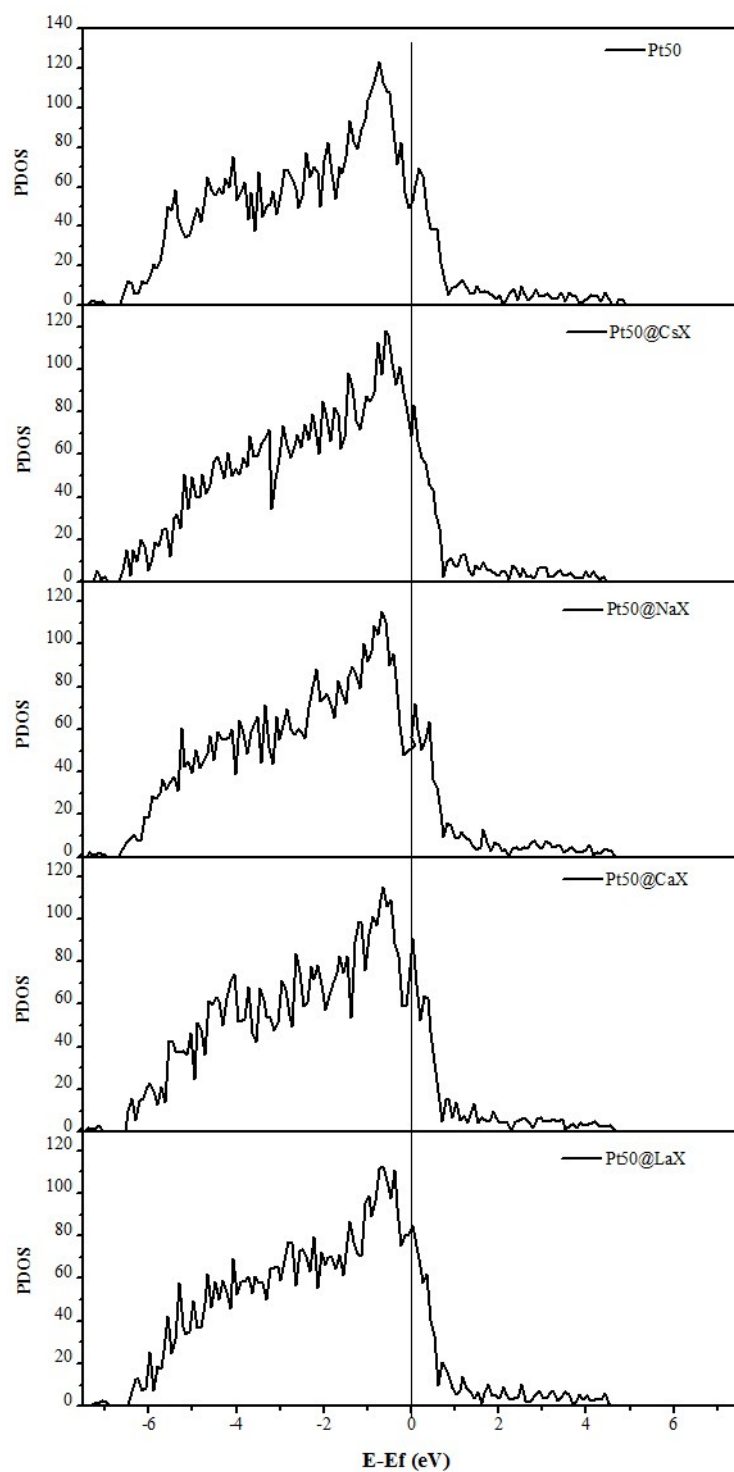

**Figure S15.** The partial density of states (PDOS) of the four samples ( $\text{Pt}_{50}@\text{LaX}$ ,  $\text{Pt}_{50}@\text{CaX}$ ,  $\text{Pt}_{50}@\text{NaX}$ ,  $\text{Pt}_{50}@\text{CsX}$ ) with PBE method

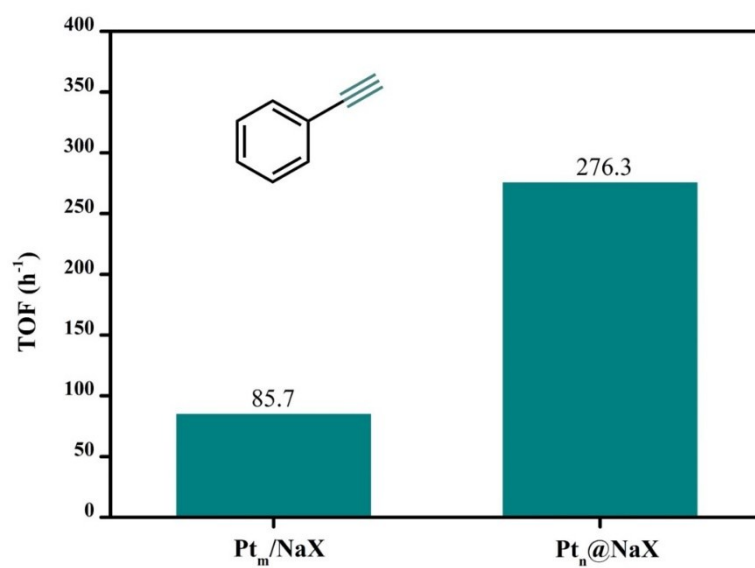

**Figure S16.** The TOF values of phenylacetylene hydrogenation over  $Pt_m/NaX$  and  $Pt_n@NaX$ . (T=50°C; P=0.5 MPa; Catalyst=40 mg; Substrate=400  $\mu$ L). The TOF is defined as the number of converted molecule of reactant per hour per atom of Pt. All the TOF values for the reaction are measured at conversions less than ~20.0%.
